# Supplementary material for: Age-dependent gene expression of Calliphora vicina pupae (Diptera: Calliphoridae) at constant and fluctuating temperatures
Source: Springer Nature journal article supplement (doi:10.1007/s00414-021-02704-x), 2021-09-27
Supplement: MOESM1 [file 414_2021_2704_MOESM1_ESM.pdf]

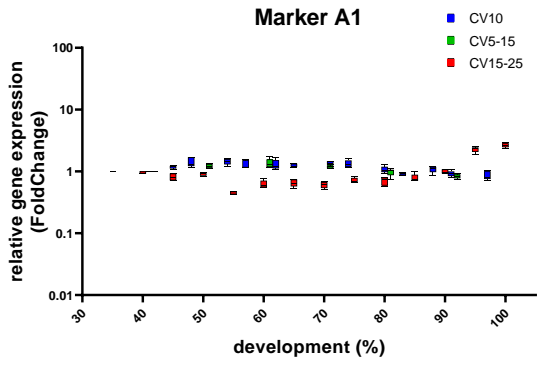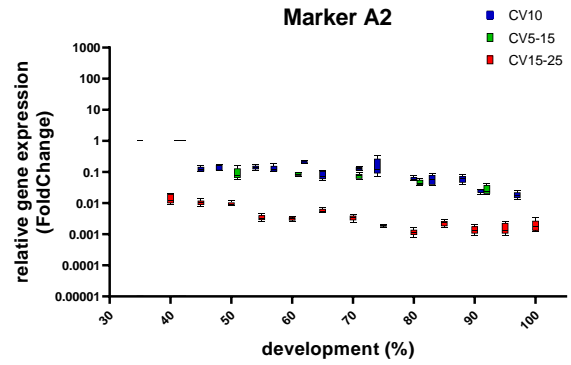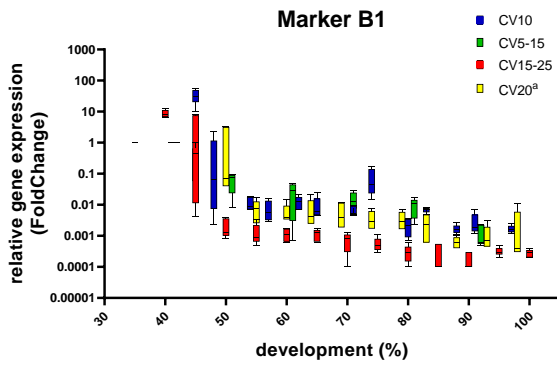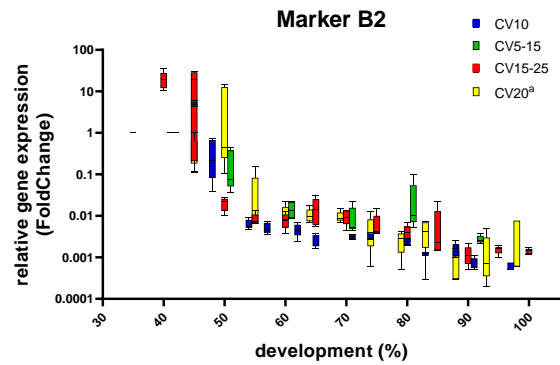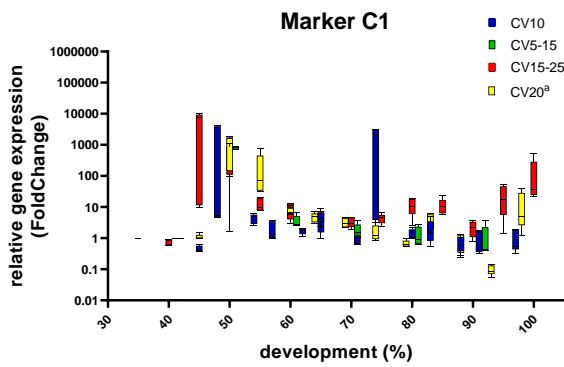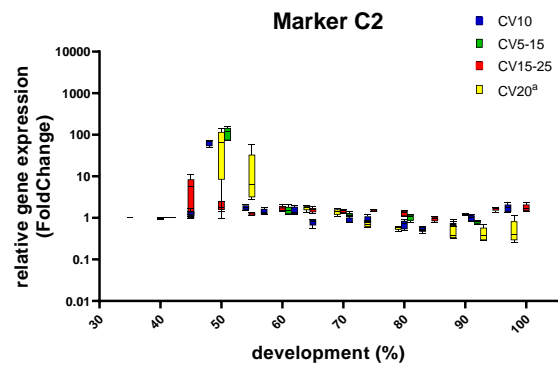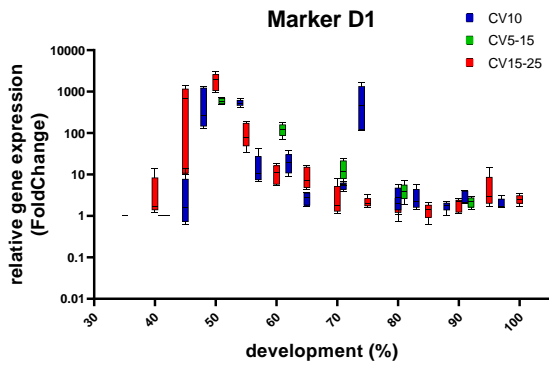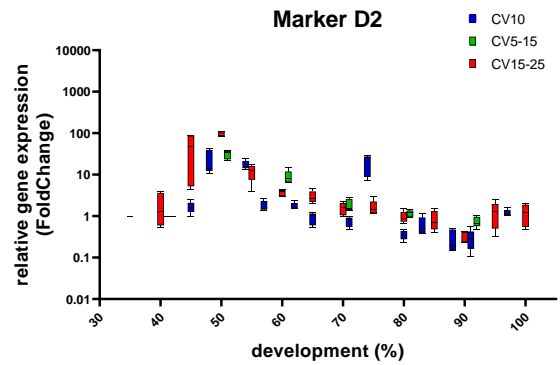

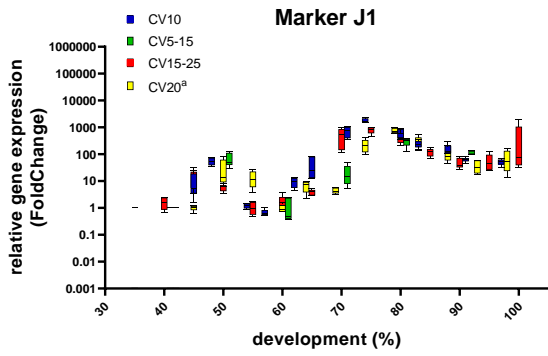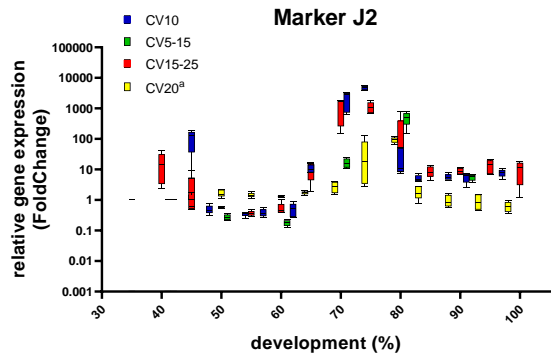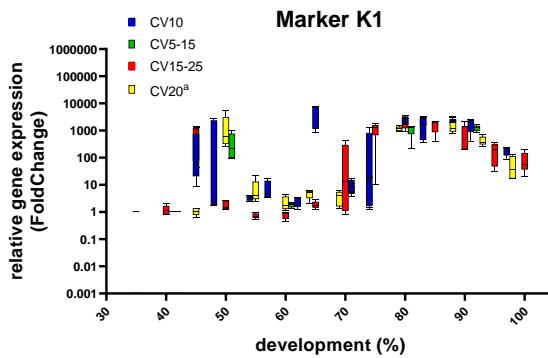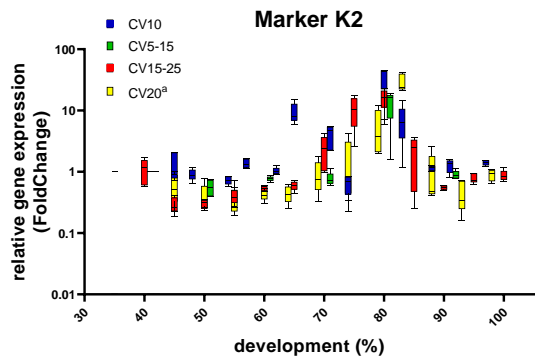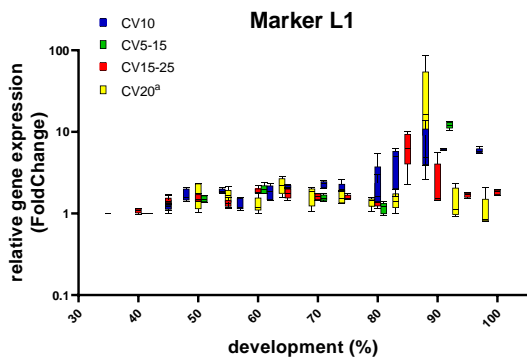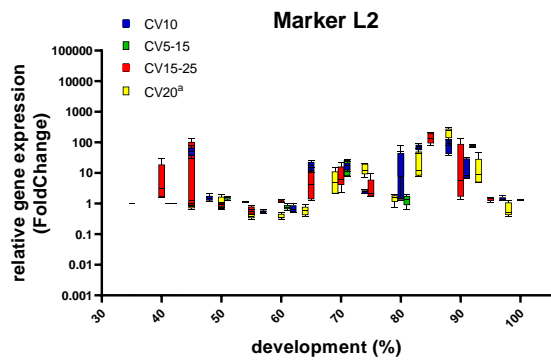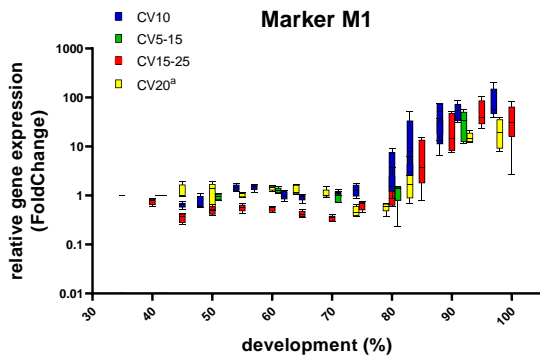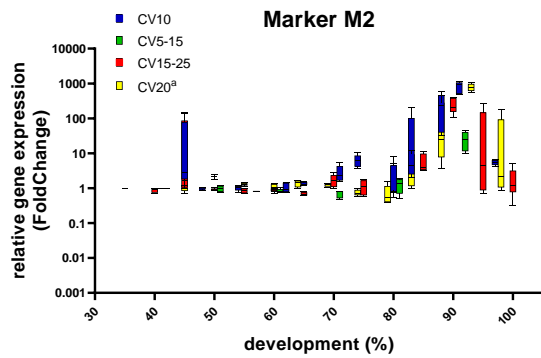

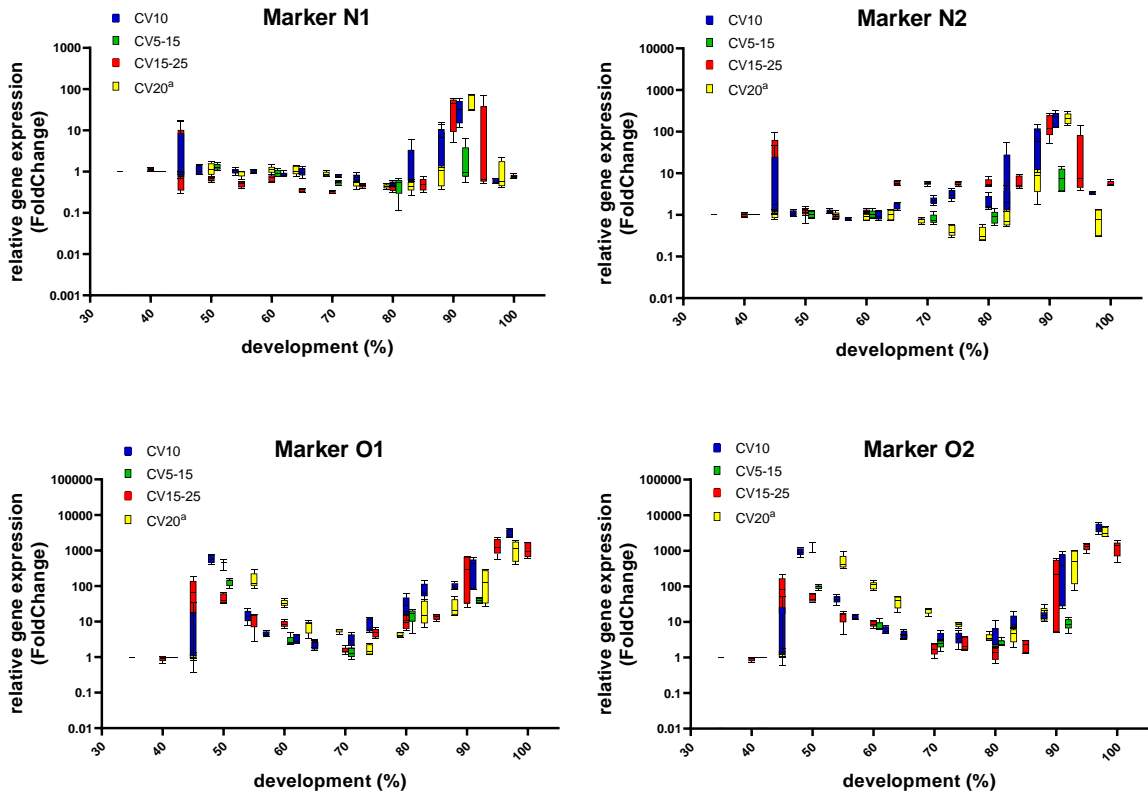

**Supplementary Fig. 1** Gene expression data of each marker of different *C. vicina* breeding (<sup>a</sup> data from [19]). The relative gene expression (FoldChange) during pupal development (%) are visualized in Tukey plots. 100 % development corresponds to the complete development from oviposition to eclosion of imago
