# Supplementary material for: Age-dependent gene expression of Calliphora vicina pupae (Diptera: Calliphoridae) at constant and fluctuating temperatures
Source: Springer Nature journal article supplement (doi:10.1007/s00414-021-02704-x), 2021-09-27
Supplement: MOESM3 [file 414_2021_2704_MOESM3_ESM.pdf]

**Supplementary Table 2** New designed primer sequences used for marker D1 and D2 amplification in the RT-qPCR.

| <b>Marker</b> | <b>Forward primer</b> | <b>Reverse primer</b> | <b>Product Length (bp)</b> | <b>Contig</b> | <b>Annotation</b>                                                          |
|---------------|-----------------------|-----------------------|----------------------------|---------------|----------------------------------------------------------------------------|
| <b>D1</b>     | AATCGTG GGGATGTGGCAAA | TGTACCCACTGCTTTCACCG  | 146                        | contig3088    | ref[XP_023306098.1 <br>probable chitinase 10<br>[ <i>Lucilia cuprina</i> ] |
| <b>D2</b>     | AGGCAGCAGTAGTGTGCAAT  | CCGTCAAGCTCGTTTGGCTA  | 175                        | contig6281    | ref[XP_023297597.1 <br>seipin [ <i>Lucilia cuprina</i> ]                   |
