# Supplementary material for: Age-dependent gene expression of Calliphora vicina pupae (Diptera: Calliphoridae) at constant and fluctuating temperatures
Source: Springer Nature journal article supplement (doi:10.1007/s00414-021-02704-x), 2021-09-27
Supplement: MOESM4 [file 414_2021_2704_MOESM4_ESM.pdf]

**Supplementary Table 3** Annotations of all age markers and reference gene using in this study. The markers were annotated using BLAST (Basic Local Alignment Search Tool).

| <b>Marker</b> | <b>Annotation</b>                                                                               |
|---------------|-------------------------------------------------------------------------------------------------|
| <b>A1</b>     | No significant similarity found                                                                 |
| <b>A2</b>     | ref XP_023295602.1 <br>uncharacterized protein LOC111678465 [ <i>Lucilia cuprina</i> ]          |
| <b>B1</b>     | gb KNC21978.1 <br>hypothetical protein FF38_12141 [ <i>Lucilia cuprina</i> ]                    |
| <b>B2</b>     | gb KNC23606.1 <br>hypothetical protein FF38_00967 [ <i>Lucilia cuprina</i> ]                    |
| <b>C1</b>     | ref XP_023309368.1 <br>fibrous sheath CABYR-binding protein-like [ <i>Lucilia cuprina</i> ]     |
| <b>C2</b>     | ref XP_023309368.1 <br>fibrous sheath CABYR-binding protein-like [ <i>Lucilia cuprina</i> ]     |
| <b>D1</b>     | ref XP_023306098.1 <br>probable chitinase 10 [ <i>Lucilia cuprina</i> ]                         |
| <b>D2</b>     | ref XP_023297597.1 <br>seipin [ <i>Lucilia cuprina</i> ]                                        |
| <b>F1</b>     | gb KNC27587.1 <br>hypothetical protein FF38_05100 [ <i>Lucilia cuprina</i> ]                    |
| <b>F2</b>     | gb TMW54454.1 <br>hypothetical protein DOY81_000446 [ <i>Sarcophaga bullata</i> ]               |
| <b>G1</b>     | ref XP_023305727.1 <br>uncharacterized protein LOC111687521 [ <i>Lucilia cuprina</i> ]          |
| <b>G2</b>     | gb KNC30751.1 <br>hypothetical protein FF38_11721 [ <i>Lucilia cuprina</i> ]                    |
| <b>H1</b>     | gb KNC29875.1 <br>hypothetical protein FF38_13502 [ <i>Lucilia cuprina</i> ]                    |
| <b>H2</b>     | gb KNC24893.1 <br>hypothetical protein FF38_03014 [ <i>Lucilia cuprina</i> ]                    |
| <b>I1</b>     | ref XP_023308080.1 <br>splicing factor, arginine/serine-rich 19-like [ <i>Lucilia cuprina</i> ] |
| <b>I2</b>     | gb KNC32097.1 <br>hypothetical protein FF38_00012 [ <i>Lucilia cuprina</i> ]                    |
| <b>J1</b>     | ref XP_023298844.1 <br>neuropeptide-like 3 [ <i>Lucilia cuprina</i> ]                           |
| <b>J2</b>     | ref XP_023304353.1 <br>histidine-rich glycoprotein-like [ <i>Lucilia cuprina</i> ]              |
| <b>K1</b>     | ref XP_023306348.1 <br>pupal cuticle protein Edg-78E-like [ <i>Lucilia cuprina</i> ]            |
| <b>K2</b>     | ref XP_023296676.1 <br>beta-glucuronidase isoform X2 [ <i>Lucilia cuprina</i> ]                 |
| <b>L1</b>     | gb KNC32423.1 <br>hypothetical protein FF38_04989 [ <i>Lucilia cuprina</i> ]                    |
| <b>L2</b>     | ref XP_023309487.1 <br>hornerin [ <i>Lucilia cuprina</i> ]                                      |
| <b>M1</b>     | ref XP_023301633.1 <br>lectizyme-like [ <i>Lucilia cuprina</i> ]                                |
| <b>M2</b>     | ref XP_023295851.1 <br>cuticle protein 18.6 [ <i>Lucilia cuprina</i> ]                          |
| <b>N1</b>     | gb KNC31140.1 <br>hypothetical protein FF38_13965 [ <i>Lucilia cuprina</i> ]                    |
| <b>N2</b>     | ref XP_023295851.1 <br>cuticle protein 18.6 [ <i>Lucilia cuprina</i> ]                          |

|           |                                                                                               |
|-----------|-----------------------------------------------------------------------------------------------|
| <b>O1</b> | No significant similarity found                                                               |
| <b>O2</b> | ref XP_023300406.1 <br>vitelline membrane protein Vm26Ab-like [ <i>Lucilia cuprina</i> ]      |
| <b>R2</b> | ref XP_023309093.1 <br>electron transfer flavoprotein subunit beta [ <i>Lucilia cuprina</i> ] |
